# Supplementary material for: Performance of the 2022 ACR/EULAR giant cell arteritis classification criteria for diagnosis in patients with suspected giant cell arteritis in routine clinical care
Source: HighWire-hosted journal article supplement (doi:10.1136/rmdopen-2022-002970), 2023-04-01
Supplement: rmdopen-2022-002970supp001_data_supplement.pdf [file rmdopen-2022-002970supp001_data_supplement.pdf]

**Supplementary Material 1.** Diagnostic accuracy of a proposed modified 2022 ACR/EULAR GCA criteria including not only bilateral axillar involvement, but also subclavian or carotid involvement, whether unilateral or bilateral. Clinical diagnosis was used as the external criteria. GCA, giant cell arteritis; LV, large vessel; Sens, sensitivity; Spec, specificity; LR+, positive likelihood ratio; LR-, negative likelihood ratio; AUC: area under the ROC curve analysis.

|                                                                           |                                  | Sens  | Spec  | LR+  | LR-  | AUC                   |
|---------------------------------------------------------------------------|----------------------------------|-------|-------|------|------|-----------------------|
| <b>All GCA (n = 188) vs controls (n = 131)</b>                            | Modified 2022 ACR/EULAR criteria | 94.7% | 71.8% | 3.36 | 0.07 | 0.940 (0.914 – 0.966) |
| <b>Isolated cranial GCA (n = 83) vs controls (n = 131)</b>                | Modified 2022 ACR/EULAR criteria | 96.4% | 71.8% | 3.41 | 0.05 | 0.961 (0.930 – 0.993) |
| <b>Isolated LV-GCA (n = 37) vs controls (n = 131)</b>                     | Modified 2022 ACR/EULAR criteria | 73%   | 71.8% | 2.59 | 0.38 | 0.738 (0.644 – 0.833) |
| <b>Biopsy proven GCA (n = 21) vs controls (n = 131)</b>                   | Modified 2022 ACR/EULAR criteria | 100%  | 71.8% | 3.55 | 0    | 0.993 (0.984 – 1)     |
| <b>LV-GCA (with or without cranial GCA) (n = 105) vs controls (n=131)</b> | Modified 2022 ACR/EULAR criteria | 93.3% | 71.8% | 3.31 | 0.09 | 0.923 (0.887 – 0.960) |
